# Supplementary material
Source: Frontiers journal article supplement (https://www.frontiersin.org/articles/525128)
Supplement: Image_1.pdf [file Image_1.pdf]

## Electronic Supplementary Information

**Green and facile synthesis of metal-organic framework Cu-BTC-supported Sn (II)-substituted Keggin heteropoly composites as esterification nanocatalyst for biodiesel production**

**Qiuyun Zhang<sup>[a,b]\*</sup>, Dan Ling<sup>[a]</sup>, Dandan Lei<sup>[a]</sup>, Jialu Wang<sup>[c]</sup>\*, Xiaofang Liu<sup>[d]</sup>, Yutao Zhang<sup>[b,c]</sup>, and Peihua Ma<sup>[e]</sup>\***

**[a]** School of Chemistry and Chemical Engineering, Anshun University, China

**[b]** Engineering Technology Center of Control and Remediation of Soil Contamination of Provincial Science & Technology Bureau, Anshun University, China

**[c]** School of Resource and Environmental Engineering, Anshun University, China

**[d]** Food and Pharmaceutical Engineering Institute, Guiyang University, China

**[e]** School of Chemistry and Chemical Engineering, Guizhou University, China

\* Correspondence: qyzhang.asu@gmail.com (Qiuyun Zhang); lu226@163.com (Jialu Wang); phma@gzu.edu.cn (Peihua Ma).

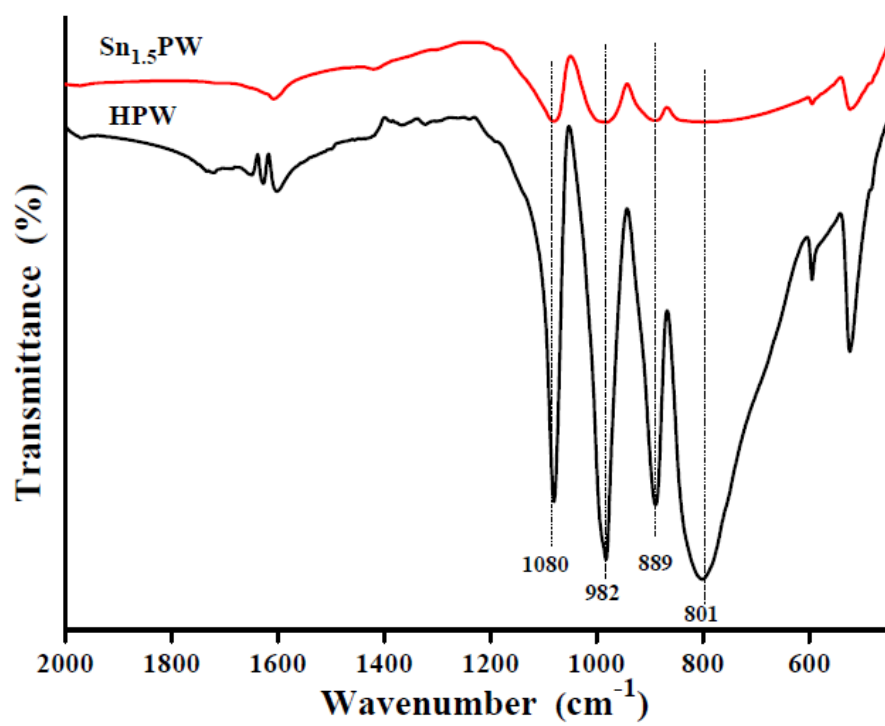

**Figure S1** FTIR spectra of the pure HPW and  $\text{Sn}_{1.5}\text{PW}$  sample
